# Supplementary material for: Opportunities for Improving Waterlogging Tolerance in Cereal Crops—Physiological Traits and Genetic Mechanisms
Source: MDPI journal article supplement (doi:10.3390/plants10081560), 2021-07-29
Supplement: s1 [file s1]

**Table S1.** Summary of QTLs associated with waterlogging tolerance in maize, rice, wheat, and barley.

| Species | Chr | QTL                  | Trait                               | LOD <sup>a</sup> | PVE (%) <sup>b</sup> | Population <sup>c</sup>                                | Population size | Population type                | Reference |
|---------|-----|----------------------|-------------------------------------|------------------|----------------------|--------------------------------------------------------|-----------------|--------------------------------|-----------|
| Maize   | 1   | <i>R_GY</i>          | Grain yield                         | 6.4              | 5.0                  | <b>CAWL-46-3-1</b><br>×CML311-2-1-3                    | 211             | RILs                           | 166       |
| Maize   | 1   | <i>Qaer1.02-1.03</i> | Aerenchyma formation                | 4.1              | 10.8                 | B64 × <i>Zea nicaraguensis</i>                         | 186             | F <sub>2</sub>                 | 112       |
| Maize   | 1   | <i>Qaer1.07</i>      | Aerenchyma formation                | 5.3              | 11.7                 | B64 × <i>Zea nicaraguensis</i>                         | 186             | F <sub>2</sub>                 | 112       |
| Maize   | 1   | <i>rl1</i>           | Root length                         | 2.74             | 5.1                  | HZ32 × <b>K12</b>                                      | 288             | F <sub>2:3</sub>               | 43        |
| Maize   | 1   | <i>rdw1</i>          | Root dry weight                     | 2.89             | 4.4                  | HZ32 × <b>K12</b>                                      | 288             | F <sub>2:3</sub>               | 43        |
| Maize   | 2   | <i>Qaer2.06</i>      | Aerenchyma formation                | 4.1              | 9.1                  | B73 × <i>Zea luxurians</i>                             | 195             | F <sub>2</sub>                 | 167       |
| Maize   | 3   | <i>R_GY</i>          | Grain yield                         | 6.1              | 4.2                  | <b>CAWL-46-3-1</b><br>×CML311-2-1-3                    | 211             | RILs                           | 166       |
| Maize   | 3   | <i>Qaer3.10</i>      | Aerenchyma formation                | 1.8              | 6.3                  | <b>B73</b> × <i>Zea luxurians</i>                      | 195             | F <sub>2</sub>                 | 167       |
| Maize   | 3   | <i>Qarf3.07-3.08</i> | Adventitious root formation         | 3.2              | 10.0                 | B64 × <b>Na4</b>                                       | 110             | F <sub>2</sub>                 | 115       |
| Maize   | 3   | <i>tdw3-3</i>        | Total dry weight                    | 2.64             | 12.2                 | HZ32 × <b>K12</b>                                      | 288             | F <sub>2:3</sub>               | 43        |
| Maize   | 3   | <i>tdw3-4</i>        | Total dry weight                    | 2.77             | 12.8                 | HZ32 × <b>K12</b>                                      | 288             | F <sub>2:3</sub>               | 43        |
| Maize   | 3   | <i>ph3</i>           | Plant height                        | 2.66             | 5.4                  | HZ32 × <b>K12</b>                                      | 288             | F <sub>2:3</sub>               | 43        |
| Maize   | 3   | <i>sdw3-2</i>        | Shoot dry weight                    | 2.68             | 5.6                  | HZ32 × <b>K12</b>                                      | 288             | F <sub>2:3</sub>               | 43        |
| Maize   | 3   | <i>rl3-1</i>         | Root length                         | 2.80             | 5.3                  | HZ32 × <b>K12</b>                                      | 288             | F <sub>2:3</sub>               | 43        |
| Maize   | 3   | <i>rl3-2</i>         | Root length                         | 3.49             | 6.7                  | HZ32 × <b>K12</b>                                      | 288             | F <sub>2:3</sub>               | 43        |
| Maize   | 3   | <i>rl3-3</i>         | Root length                         | 2.5              | 6.1                  | HZ32 × <b>K12</b>                                      | 288             | F <sub>2:3</sub>               | 43        |
| Maize   | 3   | <i>rdw3</i>          | Root dry weight                     | 2.67             | 5.2                  | HZ32 × <b>K12</b>                                      | 288             | F <sub>2:3</sub>               | 43        |
| Maize   | 4   | –                    | Leaf injury                         | 11.9-25.5        | 29.0-49.0            | <i>Zea.nicaraguensis</i> × Mi29                        | 652             | BC <sub>3</sub> F <sub>4</sub> | 113       |
| Maize   | 4   | <i>Qarf4.07</i>      | Adventitious root formation         | 4.1              | 9.0                  | B64 × <i>Zea mays ssp.</i><br><i>Huehuetenangensis</i> | 186             | F <sub>2</sub>                 | 56        |
| Maize   | 4   | <i>sdw4-3</i>        | Shoot dry weight                    | 2.60             | 5.1                  | HZ32 × <b>K12</b>                                      | 288             | F <sub>2:3</sub>               | 43        |
| Maize   | 5   | <i>R_GY</i>          | Grain yield                         | 4.5              | 8.0                  | <b>CAWL-46-3-1</b><br>×CML311-2-1-3                    | 211             | RILs                           | 166       |
| Maize   | 5   | -                    | Root and shoot fresh and dry weight | 3.02-6.10        | 6.32-12.01           | <b>HZ32</b> × <b>K12</b>                               | 180             | BC <sub>2</sub> F <sub>2</sub> | 116       |
| Maize   | 5   | <i>Qaer5.05-5.06</i> | Aerenchyma formation                | 2.6              | 4.2                  | B73 × <i>Zea luxurians</i>                             | 195             | F <sub>2</sub>                 | 167       |
| Maize   | 5   | <i>Qaer5.09</i>      | Aerenchyma formation                | 4.6              | 10.9                 | <b>B64</b> × <i>Zea nicaraguensis</i>                  | 186             | F <sub>2</sub>                 | 112       |
| Maize   | 6   | <i>sdw6-1</i>        | Shoot dry weight                    | 2.96             | 5.4                  | <b>HZ32</b> × <b>K12</b>                               | 288             | F <sub>2:3</sub>               | 43        |
| Maize   | 6   | <i>Subtol6</i>       | Mean leaf senescence score          | -                | 22.0                 | <b>Mo18W</b> × <b>B73</b>                              | 166             | RILs                           | 114       |
| Maize   | 7   | <i>rl7-3</i>         | Root length                         | 2.68             | 4.0                  | HZ32 × <b>K12</b>                                      | 288             | F <sub>2:3</sub>               | 43        |
| Maize   | 7   | <i>rl7-5</i>         | Root length                         | 2.79             | 5.5                  | <b>HZ32</b> × <b>K12</b>                               | 288             | F <sub>2:3</sub>               | 43        |
| Maize   | 7   | <i>R_GY</i>          | Grain yield                         | 11.6             | 6.1                  | <b>CAWL-46-3-1</b><br>× <b>CML311-2-1-3</b>            | 211             | RILs                           | 166       |
| Maize   | 7   | <i>Qarf7.04-7.05</i> | Adventitious root formation         | 5.1              | 21.0                 | B64 × <b>Na4</b>                                       | 110             | F <sub>2</sub>                 | 115       |
| Maize   | 8   | <i>Qaer8.06-7</i>    | Aerenchyma formation                | 4.5              | 11.6                 | <b>B64</b> × <i>Zea nicaraguensis</i>                  | 186             | F <sub>2</sub>                 | 112       |

|       |     |                         |                                   |           |          |                                              |     |                  |     |
|-------|-----|-------------------------|-----------------------------------|-----------|----------|----------------------------------------------|-----|------------------|-----|
| Maize | 8   | Qarf8.05                | Adventitious root formation       | 4.9       | 5.0      | B64 × Na4                                    | 110 | F <sub>2</sub>   | 115 |
| Maize | 8   | Qarf8.03                | Adventitious root formation       | 4.0       | 10.0     | B64 × <i>Zea mays ssp. Huehuetenangensis</i> | 186 | F <sub>2</sub>   | 56  |
| Maize | 8   | Qarf8.05                | Adventitious root formation       | 7.0       | 25.0     | B64 × <i>Zea mays ssp. Huehuetenangensis</i> | 186 | F <sub>2</sub>   | 56  |
| Maize | 9   | Qaer9.07-9.08           | Aerenchyma formation              | 1.5       | 4.5      | B73 × <i>Zea luxurians</i>                   | 195 | F <sub>2</sub>   | 167 |
| Maize | 9   | sdw9-4                  | Shoot dry weight                  | 7.03      | 20.8     | HZ32 × K12                                   | 288 | F <sub>2:3</sub> | 43  |
| Maize | 9   | tdw9-2                  | Total dry weight                  | 5.92      | 31.7     | HZ32 × K12                                   | 288 | F <sub>2:3</sub> | 43  |
| Maize | 9   | tdw9-3                  | Total dry weight                  | 5.91      | 30.7     | HZ32 × K12                                   | 288 | F <sub>2:3</sub> | 43  |
| Maize | 10  | R_GY                    | Grain yield                       | 5.4       | 3.6      | CAWL-46-3-1<br>× CML311-2-1-3                | 211 | RILs             | 166 |
| Maize | 10  | Qaer10.04               | Aerenchyma formation              | 1.8       | 3.7      | B73 × <i>Zea luxurians</i>                   | 195 | F <sub>2</sub>   | 167 |
| Maize | 10  | ph10-1                  | Plant height                      | 3.06      | 7.1      | HZ32 × K12                                   | 288 | F <sub>2:3</sub> | 43  |
| Maize | 10  | ph10-2                  | Plant height                      | 3.23      | 5.2      | HZ32 × K12                                   | 288 | F <sub>2:3</sub> | 43  |
| Maize | 10  | rl10                    | Root length                       | 2.77      | 5.6      | HZ32 × K12                                   | 288 | F <sub>2:3</sub> | 43  |
| Rice  | 1   | qTIL1 <sup>C9285</sup>  | Total internode elongation length | 4.43      | 22.0     | C9285 × T65                                  | 94  | F <sub>2</sub>   | 118 |
| Rice  | 1   | qTIL1 <sup>T65</sup>    | Total internode elongation length | 3.86      | 20.0     | W0120 × T65                                  | 94  | F <sub>2</sub>   | 118 |
| Rice  | 3   | qLEI3 <sup>C9285</sup>  | Lowest elongated internode        | 3.14      | 14.0     | C9285 × T65                                  | 94  | F <sub>2</sub>   | 118 |
| Rice  | 8   | qTIL8 <sup>T65</sup>    | Total internode elongation length | 3.36      | 17.0     | W0120 × T65                                  | 94  | F <sub>2</sub>   | 118 |
| Rice  | 9   | Sub1                    | Green leaf recovery               | 36.0      | 69.0     | IR40931-26 × PI543851                        | 169 | F <sub>2</sub>   | 120 |
| Rice  | 12  | qTIL12 <sup>C9285</sup> | Total internode elongation length | 6.19      | 27.0     | C9285 × T65                                  | 94  | F <sub>2</sub>   | 118 |
| Rice  | 12  | qTIL12 <sup>W0120</sup> | Total internode elongation length | 5.89      | 36.0     | W0120 × T65                                  | 94  | F <sub>2</sub>   | 118 |
| Rice  | 12  | qNEI12 <sup>C9285</sup> | Number of elongated internodes    | 6.25      | 27.0     | C9285 × T65                                  | 94  | F <sub>2</sub>   | 118 |
| Rice  | 12  | qNEI12 <sup>W0120</sup> | Number of elongated internodes    | 4.47      | 27.0     | W0120 × T65                                  | 94  | F <sub>2</sub>   | 118 |
| Rice  | 12  | qLEI12 <sup>C9285</sup> | Lowest elongated internode        | 7.75      | 36.0     | C9285 × T65                                  | 94  | F <sub>2</sub>   | 118 |
| Rice  | 12  | qLEI12 <sup>W0120</sup> | Lowest elongated internode        | 5.63      | 26.9     | W0120 × T65                                  | 94  | F <sub>2</sub>   | 118 |
| Wheat | 1BL | QRfbio.ua-1B-WGH        | Root fresh biomass                | 6.6       | 22.0     | USG3209 × Jaypee                             | 130 | RILs             | 122 |
| Wheat | 1BL | QRdbio.ua-1B-WGH        | Root dry biomass                  | 3.7       | 18.0     | USG3209 × Jaypee                             | 130 | RILs             | 122 |
| Wheat | 1BL | QSfbio.ua-1B-WGH        | Shoot fresh biomass               | 6.7       | 27.0     | USG3209 × Jaypee                             | 130 | RILs             | 122 |
| Wheat | 1BL | QSpadpost.ua-1B-WF      | Chlorophyll content               | 4.8       | 32.0     | USG3209 × Jaypee                             | 130 | RILs             | 122 |
| Wheat | 2B  | —                       | Root/shoot dry weight             | 3.00-8.29 | 9.5-23.3 | W7984 × Opata 85                             | 112 | RILs             | 124 |
| Wheat | 6B  | —                       | Survival rate                     | 3.45      | 10.3     | W7984 × Opata 85                             | 112 | RILs             | 124 |

|        |    |                                              |                                     |                   |                  |                   |     |          |     |
|--------|----|----------------------------------------------|-------------------------------------|-------------------|------------------|-------------------|-----|----------|-----|
| Wheat  | 6D | <i>QRlength.ua-6D-WGH</i>                    | Root length                         | 3.8               | 8.0              | USG3209 × Jaypee  | 130 | RILs     | 122 |
| Wheat  | 6D | <i>QSdbio.us-6D-WGH</i>                      | Shoot dry biomass                   | 3.6               | 6.0              | USG3209 × Jaypee  | 130 | RILs     | 122 |
| Wheat  | 6D | <i>QSpadpost.ua-6D-WF</i>                    | Chlorophyll content                 | 3.2               | 6.0              | USG3209 × Jaypee  | 130 | RILs     | 122 |
| Wheat  | 7A | <i>GRI-7A</i>                                | Germination rate index              | 2.93-7.64         | 11.4-23.9        | W7984 × Opata 85  | 112 | RILs     | 124 |
| Wheat  | 7B | –                                            | Plant height index<br>Survival rate | 2.97-4.27<br>4.66 | 8.7-12.1<br>13.6 | W7984 × Opata 85  | 112 | RILs     | 124 |
| Barley | 1H | <i>yfy2.2-2</i>                              | Leaf yellowing                      | 2.77              | 5.0              | Yerong × Franklin | 177 | DH lines | 126 |
| Barley | 1H | <i>tfy1.1-3</i>                              | Leaf yellowing                      | 2.75              | 7.1              | TX9425 × Franklin | 177 | DH lines | 126 |
| Barley | 2H | <i>KWw1.1</i><br><i>KWw1.2</i>               | Kernel weight                       | 4.48<br>7.34      | 6.82<br>16.59    | Yerong × Franklin | 156 | DH lines | 125 |
| Barley | 2H | <i>KWw2.1</i><br><i>KWw2.2</i>               | Kernel weight                       | 9.10<br>3.94      | 27.35<br>6.78    | Yerong × Franklin | 156 | DH lines | 125 |
| Barley | 2H | <i>SLw2.1</i><br><i>SLw2.2</i>               | Spike length                        | 11.16<br>8.74     | 17.44<br>13.05   | Yerong × Franklin | 156 | DH lines | 125 |
| Barley | 2H | <i>GSw1.1</i><br><i>GSw2.1</i>               | Grains per spike                    | 11.53<br>5.63     | 35.35<br>55.34   | Yerong × Franklin | 156 | DH lines | 125 |
| Barley | 2H | <i>GSw1.2</i><br><i>GSw2.2</i>               | Grains per spike                    | 6.29<br>4.76      | 12.18<br>8.22    | Yerong × Franklin | 156 | DH lines | 125 |
| Barley | 2H | <i>GYw1.1</i>                                | Grain yield                         | 2.85              | 4.74             | Yerong × Franklin | 156 | DH lines | 125 |
| Barley | 2H | <i>tfy1.1-1</i>                              | Leaf chlorosis                      | 9.21              | 23.3             | TX9425 × Franklin | 92  | DH lines | 126 |
| Barley | 2H | <i>tfsur-1</i>                               | Survival rate                       | 3.29              | 19.0             | TX9425 × Franklin | 92  | DH lines | 126 |
| Barley | 2H | <i>tfsur-2</i>                               | Survival rate                       | 2.75              | 13.2             | TX9425 × Franklin | 92  | DH lines | 126 |
| Barley | 2H | <i>yfsur-1</i>                               | Plant survival                      | 3.15              | 7.1              | Yerong × Franklin | 177 | DH lines | 126 |
| Barley | 2H | <i>QWL.YeFr.2H.1</i><br><i>QWL.YeFr.2H.2</i> | Survival rate                       | 4.62<br>10.21     | 8.4<br>17.2      | Yerong × Franklin | 177 | DH lines | 104 |
| Barley | 2H | –                                            | Yellow leaf percentage              | 2.95-10.21        | 4.0-17.2         | Yerong × Franklin | 177 | DH lines | 104 |
| Barley | 2H | <i>QWI.YyFr.2H</i>                           | Plant healthiness                   | 18.68             | 30.1             | YYXT × Franklin   | 172 | DH lines | 127 |
| Barley | 3H | <i>SLw2.3</i>                                | Spike length                        | 7.74              | 14.37            | Yerong × Franklin | 156 | DH lines | 125 |
| Barley | 3H | <i>tfy1.2-1</i><br><i>tfy2.1-1</i>           | Leaf chlorosis                      | 7.31<br>9.28      | 36.0<br>34.1     | TX9425 × Franklin | 92  | DH lines | 126 |
| Barley | 3H | <i>tfy1.1-2</i>                              | Leaf chlorosis                      | 7.31              | 36.0             | TX9425 × Franklin | 92  | DH lines | 126 |
| Barley | 3H | <i>yfy2.1-2</i><br><i>yfy2.2-1</i>           | Leaf yellowing                      | 6.41<br>4.5       | 11.9<br>9.5      | Yerong × Franklin | 177 | DH lines | 126 |
| Barley | 3H | <i>QWI.YyFr.3H</i>                           | Plant healthiness                   | 10.94             | 15.7             | YYXT × Franklin   | 172 | DH lines | 127 |
| Barley | 3H | <i>QWL.YeFr.3H</i>                           | Survival rate                       | 4.83              | 6.8              | Yerong × Franklin | 177 | DH lines | 104 |

|        |    |                                    |                        |               |              |                      |     |          |     |
|--------|----|------------------------------------|------------------------|---------------|--------------|----------------------|-----|----------|-----|
| Barley | 4H | -                                  | Yellow leaf percentage | 3.78-16.51    | 6.7-26.7     | Yerong × Franklin    | 177 | DH lines | 104 |
| Barley | 4H | <i>QWL.YeFr.4H</i>                 | Survival rate          | 14.48         | 23.9         | Yerong × Franklin    | 177 | DH lines | 104 |
| Barley | 4H | QTL-AER                            | Aerenchyma formation   | 51.4          | 76.8         | TAM407227 × Franklin | 163 | DH lines | 108 |
| Barley | 4H | <i>QTL-WL-4H</i>                   | Waterlogging tolerance | 19.2          | 34.6         | TAM407227 × Franklin | 163 | DH lines | 108 |
| Barley | 4H | -                                  | Root porosity          | 6.4           | 25.6         | Yerong × Franklin    | 177 | DH lines | 111 |
|        |    |                                    | Aerenchyma formation   | 9.4           | 44           |                      |     |          |     |
| Barley | 4H | <i>yfy2.1-3</i><br><i>yfy2.2-3</i> | Leaf yellowing         | 9.25<br>10.37 | 18.5<br>22.4 | Yerong × Franklin    | 177 | DH lines | 126 |
| Barley | 4H | -                                  | Root porosity          | 12.1-13.5     | 35.7-39.0    | YYXT × Franklin      | 126 | DH lines | 110 |
| Barley | 4H | <i>tfmas</i>                       | Biomass reduction      | 2.75          | 16.3         | TX9425 × Franklin    | 92  | DH lines | 126 |
| Barley | 4H | <i>QWL.YyFr.4H</i>                 | Plant healthiness      | 5.25          | 7.0          | YYXT × Franklin      | 172 | DH lines | 127 |
| Barley | 5H | <i>yfy1.1-2</i>                    | Leaf yellowing         | 3.94          | 7.6          | Yerong × Franklin    | 177 | DH lines | 126 |
| Barley | 5H | <i>yfsur-2</i>                     | Leaf yellowing         | 5.05          | 13.1         | Yerong × Franklin    | 177 | DH lines | 126 |
| Barley | 6H | <i>PHw2.1</i>                      | Plant height           | 5.52          | 9.74         | Yerong × Franklin    | 156 | DH lines | 125 |
| Barley | 6H | -                                  | Root porosity          | 3.7           | 10.2         | Yerong × Franklin    | 177 | DH lines | 111 |
| Barley | 6H | <i>QWL.YyFr.6H</i>                 | Plant healthiness      | 4.72          | 6.2          | YYXT × Franklin      | 172 | DH lines | 127 |
| Barley | 6H | -                                  | Yellow leaf percentage | 3.72-7.56     | 6.7-11.4     | Yerong × Franklin    | 177 | DH lines | 104 |
| Barley | 6H | QTL-WL-6H                          | Waterlogging tolerance | 4.4           | 6.3          | TAM407227 × Franklin | 163 | DH lines | 108 |
| Barley | 7H | QTL-WL-7H                          | Waterlogging tolerance | 3.7           | 5.3          | TAM407227 × Franklin | 163 | DH lines | 108 |
| Barley | 7H | <i>yfy2.1-1</i>                    | Leaf yellowing         | 3.72          | 6.7          | Yerong × Franklin    | 177 | DH lines | 126 |
| Barley | 7H | GYw1.2                             | Grain yield            | 7.45          | 30.43        | Yerong × Franklin    | 156 | DH lines | 125 |
| Barley | 7H | <i>SPw1.1</i>                      | Spike per plant        | 3.31          | 8.13         | Yerong × Franklin    | 156 | DH lines | 125 |
| Barley | 7H | <i>GSw1.3</i>                      | Grains per spike       | 7.35          | 9.06         | Yerong × Franklin    | 156 | DH lines | 125 |

**Table S2.** The detailed information of syntenic candidate genes in barley, wheat, rice, and maize.

| Gene                                | Annotation                                               | Barley                                 | Wheat A genome                  | Wheat B genome                  | Wheat D genome                  | Rice                        | Maize                                                                     |
|-------------------------------------|----------------------------------------------------------|----------------------------------------|---------------------------------|---------------------------------|---------------------------------|-----------------------------|---------------------------------------------------------------------------|
| <i>HRE2</i> ( <i>At2g47520</i> )    | Ethylene-responsive transcription                        | ERF1<br>(HORVU.MOREX.r3.1HG0060770.1)  | ERF1<br>(TraesCS1A02G231200.1)  | ERF1<br>(TraesCS1B02G243200.1)  | ERF1<br>(TraesCS1D02G230900.1)  | ERF1<br>(Os05t0361700-01)   | ERF1<br>(Zm00001d037941_P001)                                             |
| <i>ZmEREB180</i>                    | Ethylene-responsive transcription                        | ERF2<br>(HORVU.MOREX.r3.4HG0405650)    | ERF2<br>(TraesCS4A02G005600.1)  | ERF2<br>(TraesCS4B02G299400.1)  | ERF2<br>(TraesCS4D02G298400.1)  | ERF2<br>(Os03t0183000)      | ERF2<br>(Zm00001d027925_P001)                                             |
| <i>SNORKEL1</i>                     | Ethylene-responsive transcription                        | ERF3<br>(HORVU.MOREX.r3.5HG0481240)    | ERF3<br>(TraesCS5A02G215900.1)  | ERF3<br>(TraesCS5B02G214400.1)  | ERF3<br>(TraesCS5D02G223700.1)  | ERF3<br>(Os09t0434500-01)   | ERF3<br>(Zm00001d020595_P001)                                             |
| <i>GRMZM2G053503</i>                | Ethylene-responsive transcription                        | ERF4<br>(HORVU.MOREX.r3.5HG0497970.1)  | ERF4<br>(TraesCS5A02G314600.1)  | ERF4<br>(TraesCS5B02G315500.1)  | ERF4<br>(TraesCS5D02G320800.1)  | ERF4<br>(Os01t0313300-01)   | ERF4<br>(Zm00001d009103_P001)                                             |
| <i>Sub1A</i>                        | Ethylene-responsive transcription                        | N                                      | ERF5<br>(TraesCS5A02G174700.1)  | N                               | N                               | ERF5.1<br>(Os09t0287000)    | N                                                                         |
| <i>Sub1B</i>                        | Ethylene-responsive transcription                        | N                                      | ERF5<br>(TraesCS5A02G174700.1)  | N                               | N                               | ERF5.1<br>(Os09t0287000-01) | ERF5.1<br>(Zm00001d052087_P001)                                           |
| <i>Sub1C</i>                        | Ethylene-responsive transcription                        | N                                      | ERF5<br>(TraesCS5A02G174700.1)  | N                               | N                               | ERF5.2<br>(Os09t0286600)    | ERF5.2<br>(Zm00001d032095_P001)                                           |
| <i>SNORKEL2</i>                     | Ethylene-responsive transcription                        | N                                      | ERF6<br>(TraesCS7A02G120100.1)  | ERF6<br>(TraesCS7B02G018400.1)  | ERF6<br>(TraesCS7D02G118000.1)  | ERF6<br>(Os12t0603300-01)   | ERF6.1<br>(Zm00001d036251_P001),<br>ERF6.2<br>(Zm00001d045262_P001)       |
| <i>HRE1</i> ( <i>At1g72360</i> )    | Ethylene-responsive transcription                        | ERF7<br>(HORVU.MOREX.r3.7HG0661060.1)  | ERF7<br>(TraesCS7A02G158000.1)  | ERF7<br>(TraesCS7B02G062200.2)  | ERF7<br>(TraesCS7D02G158500.2)  | ERF7<br>(Os06t0194000-02)   | ERF7<br>(Zm00001d045044_P001)                                             |
| <i>RAP2.2</i> ( <i>At3g14230</i> )  | Ethylene-responsive transcription                        | ERF7<br>(HORVU.MOREX.r3.7HG0661060.1)  | ERF7<br>(TraesCS7A02G158000.1)  | ERF7<br>(TraesCS7B02G062200.1)  | ERF7<br>(TraesCS7D02G158500.1)  | ERF7<br>(Os06t0194000-01)   | ERF7<br>(Zm00001d045044_P001)                                             |
| <i>RAP2.12</i> ( <i>At1g53910</i> ) | Ethylene-responsive transcription                        | ERF7<br>(HORVU.MOREX.r3.7HG0661060.1)  | ERF7<br>(TraesCS7A02G158000.1)  | ERF7<br>(TraesCS7B02G062200.1)  | ERF7<br>(TraesCS7D02G158500.1)  | ERF7<br>(Os06t0194000-01)   | ERF7<br>(Zm00001d045044_P001)                                             |
| <i>WRK45</i>                        | WRKY transcription                                       | WRKY1<br>(HORVU.MOREX.r3.2HG0096750.1) | WRKY1<br>(TraesCS2A02G011000.1) | WRKY1<br>(TraesCS2B02G010500.1) | WRKY1<br>(TraesCS2D02G011700.1) | WRKY2<br>(Os11t0409000-01)  | WRKY1<br>(Zm00001d007329_P001)                                            |
| <i>WRK40</i>                        | WRKY transcription                                       | WRKY2<br>(HORVU.MOREX.r3.6HG0568570.1) | WRKY2<br>(TraesCS6A02G146900.1) | WRKY2<br>(TraesCS6B02G175100.2) | WRKY2<br>(TraesCS6D02G136200.1) | WRKY1<br>(Os02t0181300-01)  | WRKY2<br>(Zm00001d015515_P001)                                            |
| <i>GRMZM2G416632</i>                | Glutathione S-transferase                                | GST1<br>(HORVU.MOREX.r3.5HG0487860.1)  | GST1<br>(TraesCS5A02G247500.2)  | GST1<br>(TraesCS5B02G244700.1)  | GST1<br>(TraesCS5D02G254000.1)  | GST1<br>(Os09t0467200-01)   | GST1<br>(Zm00001d020780_P001;<br><span style="color: red;">GST23</span> ) |
| <i>GRMZM2G300965</i>                | Respiratory burst oxidase, putative                      | RBOH1<br>(HORVU.MOREX.r3.5HG0444960.1) | RBOH1<br>(TraesCS5A02G093600.1) | RBOH1<br>(TraesCS5B02G099700.1) | RBOH1<br>(TraesCS5D02G105900.1) | RBOH1<br>(Os12t0541300-01)  | RBOH1<br>(Zm00001d023859_P001)                                            |
| <i>GRMZM2G055704</i>                | Heavy metal transport/detoxification superfamily protein | HMS1<br>(HORVU.MOREX.r3.4HG0410950.1)  | HMS1<br>(TraesCS5A02G492100.1)  | HMS1<br>(TraesCS4B02G319800.1)  | N                               | HMS1<br>(Os03t0126700-01)   | HMS1<br>(Zm00001d027454_P001)                                             |
